# Supplementary material for: Identifying optimal vaccination scenarios to reduce varicella zoster virus transmission and reactivation
Source: Springer Nature journal article supplement (doi:10.1186/s12916-022-02534-7), 2022-10-08
Supplement: MOESM1 [file 23584012]

## Contents

|          |                |          |
|----------|----------------|----------|
| <b>1</b> | <b>Methods</b> | <b>2</b> |
| 1.1      | Model .....    | 2        |
| <b>2</b> | <b>Results</b> | <b>7</b> |

# Supporting Information: Identifying optimal vaccination scenarios to reduce varicella zoster virus transmission and reactivation

Kevin M Bakker<sup>a</sup>, Marisa C Eisenberg<sup>a,b</sup>, Robert J Woods<sup>c</sup> and Micaela E Martinez<sup>d,e</sup>

<sup>a</sup>Department of Epidemiology, University of Michigan, Ann Arbor, MI 48109, USA

<sup>b</sup>Department of Mathematics, University of Michigan, Ann Arbor, MI 48109, USA

<sup>c</sup>Division of Infectious Diseases, Department of Internal Medicine, University of Michigan, Ann Arbor, MI, 48109, USA

<sup>d</sup>Population Biology, Ecology and Evolutionary, Emory University, Atlanta, GA, 30322, USA

<sup>e</sup>University of Surrey, Faculty of Health and Medical Sciences, Guildford, United Kingdom

August 5, 2022

## 1 **Methods**

### 2 **1.1 Model**

3 To simulate VZV dynamics under various vaccination regimes, we expanded our susceptible, exposed,  
4 infected with chickenpox, latent (recovered from chickenpox), infected with shingles, and second latent  
5 (recovered from shingles) state model [1] to include chickenpox and shingles vaccinated classes (Fig 1).  
6 Population data for Thailand were collected from the United Nations, and interpolated for monthly births  
7 [2]. Model state transitions are shown in Eqs. 1—8. For each class  $A$ ,  $p_A$  represents the fraction who  
8 remain in the  $A$  class for the next time step (defined below).  $\chi$  represents the effectiveness of a vaccine.

| Parameter           | Description                                     | Units             | Value               | Range             | Sources |
|---------------------|-------------------------------------------------|-------------------|---------------------|-------------------|---------|
| VZ Spline 1         | Chickenpox spline component                     | $\frac{1}{weeks}$ | 4.15                | (3.88, 5.15)      | Fitted  |
| VZ Spline 2         | Chickenpox spline component                     | $\frac{1}{weeks}$ | 3.40                | (3.32,4.64)       | Fitted  |
| VZ Spline 3         | Chickenpox spline component                     | $\frac{1}{weeks}$ | 0.94                | (0.90,1.27)       | Fitted  |
| VZ Spline 4         | Chickenpox spline component                     | $\frac{1}{weeks}$ | 1.85                | (1.75,2.43)       | Fitted  |
| VZ Spline 5         | Chickenpox spline component                     | $\frac{1}{weeks}$ | 2.30                | (2.20,2.89)       | Fitted  |
| VZ Spline 6         | Chickenpox spline component                     | $\frac{1}{weeks}$ | 1.56                | (1.46,2.08)       | Fitted  |
| HZ Spline 1         | Shingles spline component                       | $\frac{1}{weeks}$ | 1.93                | (1.31,1.98)       | Fitted  |
| HZ Spline 2         | Shingles spline component                       | $\frac{1}{weeks}$ | 2.47                | (1.76,2.55)       | Fitted  |
| HZ Spline 3         | Shingles spline component                       | $\frac{1}{weeks}$ | 2.46                | (1.67,2.47)       | Fitted  |
| HZ Spline 4         | Shingles spline component                       | $\frac{1}{weeks}$ | 2.83                | (1.95,2.90)       | Fitted  |
| HZ Spline 5         | Shingles spline component                       | $\frac{1}{weeks}$ | 2.41                | (1.69,2.50)       | Fitted  |
| HZ Spline 6         | Shingles spline component                       | $\frac{1}{weeks}$ | 2.22                | (1.51,2.22)       | Fitted  |
| $\rho^{VZ}$         | Chickenpox reporting rate                       | Percent           | 99.5                | (77.56,100)       | Fitted  |
| M1                  | Time-varying report rate parameter for shingles | NA                | 3.25e-5             | (3.10e-5,3.38e-5) | Fitted  |
| M2                  | Baseline report rate for shingles               | NA                | 0.003               | (1.6e-14,154)     | Fitted  |
| $\beta_{SD}$        | Standard deviation for process noise            | NA                | 0.24                | (0.18,0.27)       | Fitted  |
| $\psi$              | Exogenous boosting                              | NA                | 1                   | NA                | Fitted  |
| $\frac{1}{\delta}$  | Lifespan                                        | Weeks             | 73 * 52             | NA                | [2]     |
| $\frac{1}{\lambda}$ | Shingles Reactivation Probability               | Weeks             | 60 * 52             | NA                | [3, 4]  |
| $\frac{1}{\zeta}$   | Length of chickenpox immunity                   | Weeks             | 20 (or 40)*52       | NA                | [5]     |
| $\frac{1}{\sigma}$  | Length of shingles immunity                     | Weeks             | 5 years or lifetime | NA                | [6]     |
| $\tau$              | Chickenpox vaccination level                    | Value             | 0 – 100             | NA                | [6]     |
| $\chi$              | Shingles vaccination level                      | value             | 0 – 1               | NA                | [6]     |

10 **Table S1:** Parameter Table of fitted MLEs from [1], with additional parameters for vaccination simulations.

$$S_{t+1} = (1 - \tau) * \mu_t + (S_t \cdot pS) \quad (1)$$

11 where  $\mu_t$  is the number of children born at time, t (treated as a known forcing function based on data).  $\tau$   
 12 represented the chickenpox vaccination rate. Below are the transitions for states E-L2;

$$E_{t+1} = S_t * (1 - pS) \left( \frac{\lambda}{\lambda + \delta} \right) + (E_t \cdot pE) \quad (2)$$

$$I_{VZ_{t+1}} = E_t * (1 - pE) \left( \frac{\phi}{\phi + \delta} \right) + (I_{VZ_t} \cdot pI_{VZ}) \quad (3)$$

$$L_{1_{t+1}} = (1 - \chi) * I_{VZ_t} * (1 - pI_{VZ}) \left( \frac{\gamma}{\gamma + \delta} \right) + (1 - \chi) * V_{VZ_t} * (1 - pV_{VZ}) \left( \frac{\xi}{\xi + \delta} \right) + \\ (1 - \chi) * V_{HZ_t} * (1 - pV_{HZ}) \left( \frac{\sigma}{\sigma + \delta} \right) + (L_{1_t} \cdot pL_1) \quad (4)$$

$$I_{HZ_{t+1}} = L_{1_t} * (1 - pL_1) \left( \frac{\iota\kappa\psi}{\iota\kappa\psi + \delta} \right) + (I_{HZ_t} \cdot pI_{HZ}) \quad (5)$$

$$L_{2_{t+1}} = I_{HZ_t} * (1 - pI_{HZ}) \left( \frac{\gamma}{\gamma + \delta} \right) + (L_{2_t} \cdot pL_2). \quad (6)$$

$$V_{VZ_{t+1}} = \tau * \mu_t + (V_{VZ_t} \cdot pV_{VZ}). \quad (7)$$

$$V_{HZ_{t+1}} = \chi * I_{VZ_t} * (1 - pI_{VZ}) \left( \frac{\gamma}{\gamma + \delta} \right) + \chi * V_{VZ_t} * (1 - pV_{VZ}) \left( \frac{\xi}{\xi + \delta} \right) + \\ \chi * V_{HZ_t} * (1 - pV_{HZ}) \left( \frac{\sigma}{\sigma + \delta} \right) + (L_{1_t} \cdot pL_1) \quad (8)$$

13 New infections for chickenpox at each time step were recorded as

$$I_{VZ_{new}} = E_t * (1 - pE) \left( \frac{\phi}{\phi + \delta} \right) \quad (9)$$

14 while new shingles infections were recorded as

$$I_{HZ_{new}} = L_{1_t} * (1 - pL_1) \left( \frac{\iota\kappa\psi}{\iota\kappa\psi + \delta} \right). \quad (10)$$

15 The above difference equations for each state are displayed in Fig 1, using the transition rates from  
16 Eqs. 11, 14—16, & 18—21. The generalized model transition probabilities followed a Poisson process,

17 where the fraction of those who remained in the susceptible state ( $pS$ ) was modeled as

$$pS = e^{-(\lambda+\delta)} \quad (11)$$

18 where  $\lambda$  is the force of infection and  $\delta$  is the death rate, which was assumed to be constant across all  
19 model states and set for an average lifespan of 73 years [2]. The force of infection,  $\lambda$  was estimated as

$$\lambda = \beta \left( \frac{(I_{VZ}) + (\omega I_{HZ})}{N} \right)^\alpha \epsilon \quad (12)$$

20 where  $\beta$  was the time-varying seasonal force of infection for chickenpox.  $I_{VZ}$  was the number of current  
21 individuals infected with chickenpox,  $\omega$  was a scalar for the relative infectiousness of shingles - allowing  
22 for reactivated shingles individuals to infect a susceptible individual,  $I_{HZ}$  was the number of individuals  
23 with reactivated shingles,  $N$  was the total population,  $\alpha$  was a scalar for the force of infection [7], and  $\epsilon$   
24 was a noise term which acted as environmental stochasticity.  $\epsilon$ , was drawn from a gamma distribution  
25 with a mean of 1 and variance  $\theta$  (process noise dispersion parameter) [8].

26 A B-spline was used to fit  $\beta$ . Biologically, this represents the hypothesis that chickenpox is driven by  
27 a combination of seasonal factors (including school terms wherein students have increased contact rates  
28 and other seasonal factors).

$$\beta = \exp \sum_{i=1}^6 q_i \zeta_{A_i} \quad (13)$$

29 where  $\beta$  is the seasonal forcing for chickenpox and each  $\zeta_A$  is a periodic B-spline basis with 1 year period.  
30  $\beta$  is summarized in table S1 as VZ splines 1-6. The fraction of those who remained in the exposed state  
31 were modeled as

$$pE = e^{-(\phi+\delta)} \quad (14)$$

32 where  $\phi$  was a rate at which an individual became infectious after being exposed to chickenpox (parameter  
33 scaled to 1/2 week). The fraction of those who remained in the infected with chickenpox state  $I_{VZ}$  were  
34 modeled as

$$pI_{VZ} = e^{-(\nu+\delta)} \quad (15)$$

35 where  $\gamma$  was a fixed rate in which individuals recovered from chickenpox (parameter scaled to 7 days). The  
 36 fraction of those who remained in the first latent state, but remained susceptible to shingles reactivation  
 37 were modeled as

$$pL1 = e^{-(\iota\kappa\psi+\delta)} \quad (16)$$

38 where  $\iota$  was a fixed parameter which represented the fraction of those infected with chickenpox that  
 39 would reactivate later in life as shingles (parameter scaled for a mean age 60 of years),  $\kappa$  is the seasonal  
 40 reactivation rate of shingles, and  $\psi$  is the time-varying immunity boosting from chickenpox infections (see  
 41 below for both  $\kappa$  and  $\psi$  model combinations, also Table S1 and Fig 2).  $\kappa$  was modeled as a B-spline,  
 42 similar to chickenpox:

$$\kappa = \exp \sum_{i=1}^6 q_i \zeta_{B_i t} \quad (17)$$

43 where each  $\zeta_B$  is a different (from  $\zeta_A$ ) B-spline basis with 1 year period.  $\kappa$  is summarized in table S1  
 44 as HZ splines 1-6. All parameters were estimated using maximum likelihood by iterated particle filtering  
 45 (MIF) in the R-package [9, 10].

46 The fraction of those who remained infected with shingles were modeled as

$$pIHZ = e^{-(\gamma+\delta)} \quad (18)$$

47 with the same recovery rate,  $\gamma$  (parameter scaled to 7 days), as chickenpox, while the fraction of those  
 48 who remained in the second latent state were modeled as

$$pL2 = e^{-(\delta)} \quad (19)$$

49 where natural death was the only exit from the second latent state.

50 The fraction of those who remained in the chickenpox vaccinated class was modeled as

$$pV_{VZ} = e^{-(\xi+\delta)} \quad (20)$$

51 where  $\xi$  represented the length of immunity to chickenpox vaccination, which was set to 20 years [5].

52 The fraction of those who remained in the shingles vaccinated class was modeled as

$$pV_{HZ} = e^{-(\sigma+\delta)} \quad (21)$$

53 where  $\sigma$  represented the length of immunity to shingles vaccination, which was set to either 5 years [6]  
 54 or lifetime.

## 55 2 Results

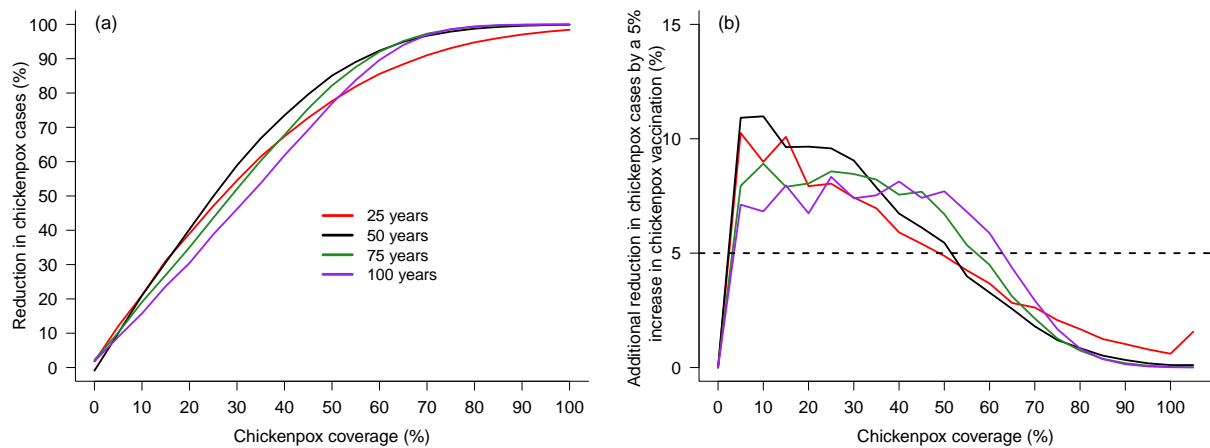

**Figure S1:** Impact of chickenpox vaccination. (a) Chickenpox coverage is shown on the x-axis and the total reduction in chickenpox cases on the y-axis. The lines represent case reductions at 25 years (red), 50 years (black), 75 years (green), and 100 years (purple). (b) Percentage of additional chickenpox cases prevented by increasing coverage by 5% (that is, the rate of change in chickenpox reduction from (a)). Dotted line at 5% identifies where you would achieve a greater than 5% reduction in cases for 5% additional coverage (above the line) and where you would achieve less than a 5% reduction in cases (below the dotted line).

**Table S2:** Summary of the total cases over 100 years of all models against the null model lacking vaccination for chickenpox or shingles. ID is the model number correlating to Fig 1. Model ID is a quick reference to the model combinations explained in the next four columns. VZ Roll-out is the chickenpox vaccination coverage (slow - measles, moderate - hepatitis B, aggressive - Japanese Encephalitis), VZ uptake is the uptake level for the chickenpox vaccine, HZ coverage is the shingles vaccination coverage, and HZ immunity is the length of immunity provided by shingles vaccination. All models were compared to the number of cases with no chickenpox or shingles vaccination (top row). % of VZ cases is the percentage of chickenpox cases in that model scenario compared to the scenario without any vaccination over the entire 100 years (top row). % of HZ cases is the percentage of chickenpox cases in that model scenario compared to the scenario without any vaccination over the entire 100 years (top row).

| ID          | VZ Roll-out | VZ Uptake | HZ Coverage | HZ Immunity | % of VZ Cases | % of HZ Cases |
|-------------|-------------|-----------|-------------|-------------|---------------|---------------|
| NA_NA_NA_NA | NA          | NA        | NA          | NA          | 100%          | 100%          |
| S_P_NA_NA   | Slow        | Perfect   | NA          | NA          | 12.9%         | 142.7%        |
| S_P_US_5    | Slow        | Perfect   | 33%         | 5           | 12.8%         | 135.2%        |
| S_P_US_L    | Slow        | Perfect   | 33%         | Life        | 12.9%         | 95.6%         |
| S_P_UK_5    | Slow        | Perfect   | 50%         | 5           | 12.9%         | 128.2%        |
| S_P_UK_L    | Slow        | Perfect   | 50%         | Life        | 12.8%         | 71.3%         |
| S_L_NA_NA   | Slow        | Leaky     | NA          | NA          | 16.4%         | 121.1%        |
| S_L_US_5    | Slow        | Leaky     | 33%         | 5           | 16.5%         | 114.9%        |
| S_L_US_L    | Slow        | Leaky     | 33%         | Life        | 16.3%         | 81.1%         |
| S_L_UK_5    | Slow        | Leaky     | 50%         | 5           | 16.3%         | 108.9%        |
| S_L_UK_L    | Slow        | Leaky     | 50%         | Life        | 16.4%         | 60.5%         |
| M_P_NA_NA   | Moderate    | Perfect   | NA          | NA          | 8.9%          | 149.4%        |
| M_P_US_5    | Moderate    | Perfect   | 33%         | 5           | 8.9%          | 141.7%        |
| M_P_US_L    | Moderate    | Perfect   | 33%         | Life        | 9.0%          | 100.1%        |
| M_P_UK_5    | Moderate    | Perfect   | 50%         | 5           | 9.1%          | 134.6%        |
| M_P_UK_L    | Moderate    | Perfect   | 50%         | Life        | 9.1%          | 74.8%         |
| M_L_NA_NA   | Moderate    | Leaky     | NA          | NA          | 12.1%         | 125.1%        |
| M_L_US_5    | Moderate    | Leaky     | 33%         | 5           | 12.1%         | 118.8%        |
| M_L_US_L    | Moderate    | Leaky     | 33%         | Life        | 12.2%         | 83.9%         |
| M_L_UK_5    | Moderate    | Leaky     | 50%         | 5           | 12.2%         | 112.9%        |
| M_L_UK_L    | Moderate    | Leaky     | 50%         | Life        | 12.2%         | 62.6%         |
| A_P_NA_NA   | Aggressive  | Perfect   | NA          | NA          | 7.1%          | 147.3%        |
| A_P_US_5    | Aggressive  | Perfect   | 33%         | 5           | 7.0%          | 139.7%        |
| A_P_US_L    | Aggressive  | Perfect   | 33%         | Life        | 7.2%          | 98.7%         |
| A_P_UK_5    | Aggressive  | Perfect   | 50%         | 5           | 7.0%          | 132.6%        |
| A_P_UK_L    | Aggressive  | Perfect   | 50%         | Life        | 7.1%          | 73.6%         |
| A_L_NA_NA   | Aggressive  | Leaky     | NA          | NA          | 10.5%         | 123.2%        |
| A_L_US_5    | Aggressive  | Leaky     | 33%         | 5           | 10.6%         | 117.1%        |
| A_L_US_L    | Aggressive  | Leaky     | 33%         | Life        | 10.5%         | 82.5%         |
| A_L_UK_5    | Aggressive  | Leaky     | 50%         | 5           | 10.6%         | 111.3%        |
| A_L_UK_L    | Aggressive  | Leaky     | 50%         | Life        | 10.5%         | 61.6%         |



**Table S3:** Summary of the total cases in 25 year intervals for all models against the null model lacking vaccination for chickenpox or shingles. ID is the model number correlating to Fig 1 & Table S2. All models were compared to the number of cases with no chickenpox or shingles vaccination (top row). VZ is the percentage of chickenpox cases in that model scenario compared to the scenario without any vaccination (top row). HZ is the percentage of shingles cases in that model scenario compared to the scenario without any vaccination (top row). Greyed rows represent rows that never experienced an increase in shingles cases compared to the no vaccination model.

| ID          | % of cases |        |             |        |             |        |              |        |
|-------------|------------|--------|-------------|--------|-------------|--------|--------------|--------|
|             | Years 1-25 |        | Years 26-50 |        | Years 51-75 |        | Years 76-100 |        |
|             | VZ         | HZ     | VZ          | HZ     | VZ          | HZ     | VZ           | HZ     |
| NA_NA_NA_NA | 100%       | 100%   | 100%        | 100%   | 100%        | 100%   | 100%         | 100%   |
| S_P_NA_NA   | 42.8%      | 101%   | 1.8%        | 150.6% | 0.2%        | 164.1% | 0.4%         | 145.7% |
| S_P_US_5    | 42.4%      | 87.0%  | 1.8%        | 141.1% | 0.2%        | 158.5% | 0.4%         | 142.6% |
| S_P_US_L    | 42.7%      | 67.4%  | 1.8%        | 100.9% | 0.2%        | 110.0% | 0.4%         | 97.6%  |
| S_P_UK_5    | 42.7%      | 76.7%  | 1.8%        | 132.0% | 0.2%        | 152.5% | 0.4%         | 139.1% |
| S_P_UK_L    | 42.6%      | 50.2%  | 1.8%        | 75.3%  | 0.2%        | 82.0%  | 0.4%         | 72.9%  |
| S_L_NA_NA   | 49.5%      | 97.9%  | 5.7%        | 129.5% | 1.9%        | 134.3% | 1.3%         | 117.8% |
| S_L_US_5    | 49.6%      | 85.3%  | 5.7%        | 122.4% | 1.9%        | 130.1% | 1.3%         | 115.3% |
| S_L_US_L    | 49.2%      | 65.2%  | 5.8%        | 86.7%  | 1.8%        | 90.0%  | 1.3%         | 78.9%  |
| S_L_UK_5    | 49.0%      | 74.4%  | 5.8%        | 114.9% | 1.8%        | 125.6% | 1.3%         | 112.7% |
| S_L_UK_L    | 49.3%      | 48.8%  | 5.7%        | 64.7%  | 1.9%        | 67.1%  | 1.3%         | 58.9%  |
| M_P_NA_NA   | 29.9%      | 105.8% | 0.8%        | 164.0% | 0.1%        | 170.4% | 0.2%         | 147.7% |
| M_P_US_5    | 30.0%      | 91.6%  | 0.8%        | 154.0% | 0.1%        | 165.2% | 0.2%         | 145.0% |
| M_P_US_L    | 30.2%      | 71.1%  | 0.8%        | 110.0% | 0.1%        | 114.2% | 0.2%         | 99.0%  |
| M_P_UK_5    | 30.6%      | 80.1%  | 0.8%        | 144.1% | 0.1%        | 159.5% | 0.2%         | 141.6% |
| M_P_UK_L    | 30.6%      | 53.3%  | 0.8%        | 82.1%  | 0.1%        | 85.2%  | 0.2%         | 73.9%  |
| M_L_NA_NA   | 37.1%      | 100.2% | 3.6%        | 138.1% | 1.3%        | 138.3% | 1.0%         | 118.9% |
| M_L_US_5    | 36.9%      | 87.0%  | 3.6%        | 130.4% | 1.3%        | 134.4% | 1.0%         | 116.6% |
| M_L_US_L    | 37.3%      | 67.3%  | 3.6%        | 92.6%  | 1.3%        | 92.7%  | 1.0%         | 79.6%  |
| M_L_UK_5    | 37.3%      | 76.6%  | 3.6%        | 122.7% | 1.3%        | 130.0% | 1.0%         | 114.1% |
| M_L_UK_L    | 37.4%      | 50.3%  | 3.6%        | 69.1%  | 1.3%        | 69.2%  | 1.0%         | 59.4%  |
| A_P_NA_NA   | 23.7%      | 107.8% | 0.8%        | 164.1% | 0.1%        | 166.3% | 0.3%         | 142.6% |
| A_P_US_5    | 23.5%      | 92.3%  | 0.8%        | 154.3% | 0.1%        | 161.4% | 0.3%         | 139.9% |
| A_P_US_L    | 24.0%      | 72.4%  | 0.8%        | 110.0% | 0.1%        | 111.4% | 0.3%         | 95.6%  |
| A_P_UK_5    | 23.5%      | 81.1%  | 0.8%        | 144.5% | 0.1%        | 156.1% | 0.3%         | 136.9% |
| A_P_UK_L    | 23.6%      | 53.4%  | 0.8%        | 82.0%  | 0.1%        | 83.1%  | 0.3%         | 71.3%  |
| A_L_NA_NA   | 31.0%      | 100.7% | 3.7%        | 137.7% | 1.6%        | 135.1% | 1.4%         | 115.1% |
| A_L_US_5    | 31.0%      | 87.6%  | 3.7%        | 130.3% | 1.6%        | 131.5% | 1.4%         | 112.9% |
| A_L_US_L    | 30.9%      | 67.4%  | 3.7%        | 92.2%  | 1.6%        | 90.5%  | 1.4%         | 77.1%  |
| A_L_UK_5    | 31.1%      | 76.7%  | 3.7%        | 122.7% | 1.6%        | 127.4% | 1.4%         | 110.6% |
| A_L_UK_L    | 31.0%      | 50.4%  | 3.7%        | 68.9%  | 1.6%        | 67.6%  | 1.4%         | 57.5%  |

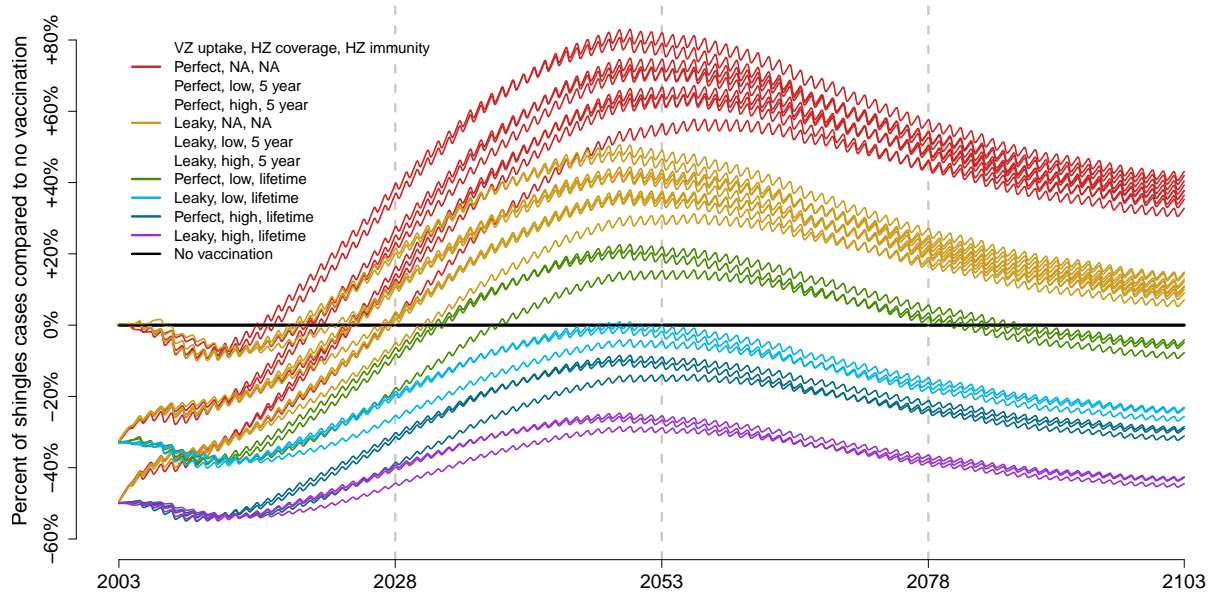

**Figure S2:** Percent of shingles cases by month of each model simulation compared to the null model with no vaccination (black). Models that offered no shingles vaccination or only 5-years of shingles immunity from vaccination, whether with perfect (red) or leaky (yellow) chickenpox uptake resulted in an increase in shingles cases compared to no vaccination at all. Lifetime shingles immunity from vaccination with low shingles coverage and perfect (green) or leaky (light blue) chickenpox uptake, resulted in reduced shingles cases. Lifetime shingles immunity paired with high shingles coverage rates with perfect (dark blue) or leaky (purple) chickenpox uptake resulted in the largest reduction in shingles cases.

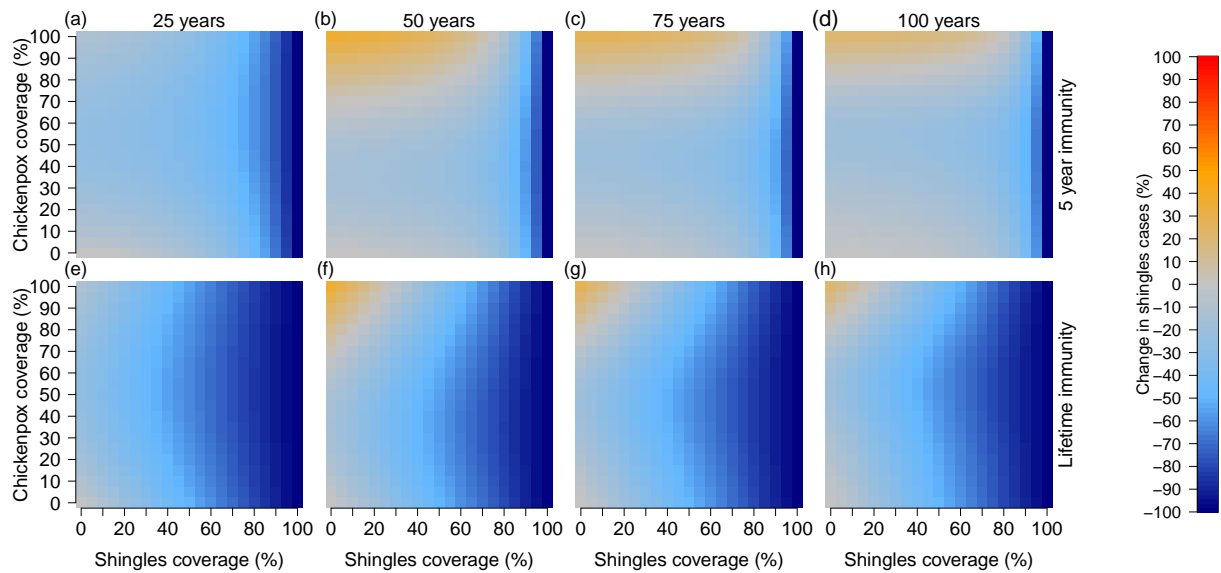

**Figure S3:** Percent change in shingles cases compared to no vaccination, using a 40 year protection from chickenpox vaccination. Top row (a—d) simulations provided 5 years of immunity from shingles vaccination and bottom row (e—h) simulations provided lifetime immunity from shingles vaccination. Each column represents the number of years after vaccine introduction; (a & e) 25 years, (b & f) 50 years, (c & g) 75 years, and (d & h) 100 years. Shingles and chickenpox vaccine coverage (%) are shown on the x- and y-axes. Color scale on the right indicates the largest decrease in shingles cases can be seen in dark blue, while the largest increase in shingles cases can be seen in red.

## 56 References

- 57 1. Bakker, K. M, Eisenberg, M. C, Woods, R, & Martinez, M. E. (2021) Exploring the seasonal drivers  
58 of varicella zoster virus transmission and reactivation. *American Journal of Epidemiology* **190**, 1814–  
59 1820.
- 60 2. UN. (2015) <http://esa.un.org/unpd/wpp/> Accessed June 18, 2015.
- 61 3. Thomas, S & Hall, A. (2001) What does epidemiology tell us about risk factors for herpes zoster?  
62 *The Lancet* **4**, 26–33.
- 63 4. Donahue, J, Choo, P, Manson, J, & Platt, R. (1995) The incidence of herpes zoster. *Archives of Internal*  
64 *Medicine* **155**, 1605–1609.
- 65 5. CDC. (2020) About the Varicella Vaccine. Accessed May 11, 2020.
- 66 6. CDC. (2020) Zostovax. Accessed May 11, 2020.
- 67 7. Stroud, P. D, Sydoriak, S. J, Riese, J. M, Smith, J. P, Mniszewski, S. M, & Romero, P. R. (2006) Semi-  
68 empirical power-law scaling of new infection rate to model epidemic dynamics with inhomogeneous  
69 mixing. *Mathematical biosciences* **203**, 301–318.
- 70 8. Martinez-Bakker, M, Rohani, P, & King, A. A. (2015) Unraveling the transmission dynamics of polio.  
71 *PLoS Biology* **13**, e1002172.
- 72 9. King, A. A, Nguyen, D, & Ionides, E. L. (2016) Statistical inference for partially observed Markov  
73 processes via the R package pomp. *Journal of Statistical Software* **69**, 1–43.
- 74 10. King, A. A, Ionides, E. L, Bretó, C. M, Ellner, S. P, Ferrari, M. J, Kendall, B. E, Lavine, M, Nguyen, D,  
75 Reuman, D. C, Wearing, H, & Wood, S. N. (2020) *pomp: Statistical Inference for Partially Observed*  
76 *Markov Processes*. R package, version 2.5.
